# Supplementary material for: MOF-derived sponge-like hierarchical porous carbon for flexible all-solid-state supercapacitors
Source: Royal Society of Chemistry journal article supplement (doi:10.1039/c8qm00284c), 2018-01-01
Supplement: c8qm00284c1.pdf [file c8qm00284c1.pdf]

## Supporting Information

### MOFs-derived Sponge-Like Hierarchical Porous Carbon for High-Performance Flexible All-Solid-State Supercapacitor

*Xiao-Man Cao, Zhi-Jia Sun, Si-Yu Zhao, Bing Wang and Zheng-Bo Han\**

*College of Chemistry, Liaoning University. Shenyang 110036 P.R. China*

*\*Corresponding author. E-mail: [ceshzb@lnu.edu.cn](mailto:ceshzb@lnu.edu.cn)*

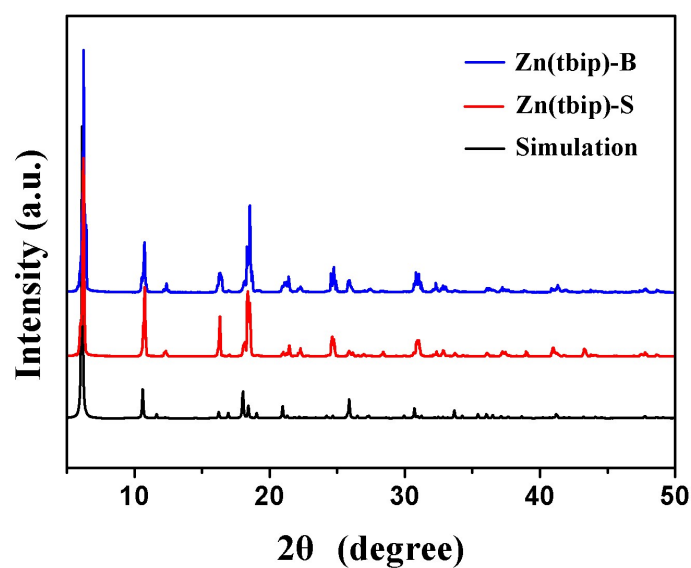

Fig. S1 PXRD patterns of the simulated single crystal crystallography data and the as-synthesized **Zn(tbip)-B** and **Zn(tbip)-S**.

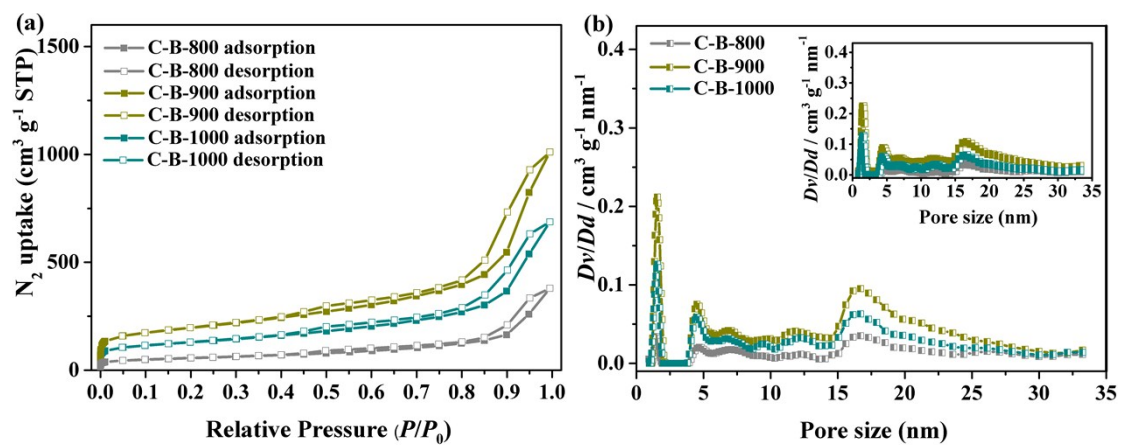

Fig. S2 (a) Nitrogen adsorption-desorption isotherms of **C-B-n** at 77 K (STP = standard temperature pressure); (b) Pore size distribution calculated using the NLDFT method for **C-B-n**.

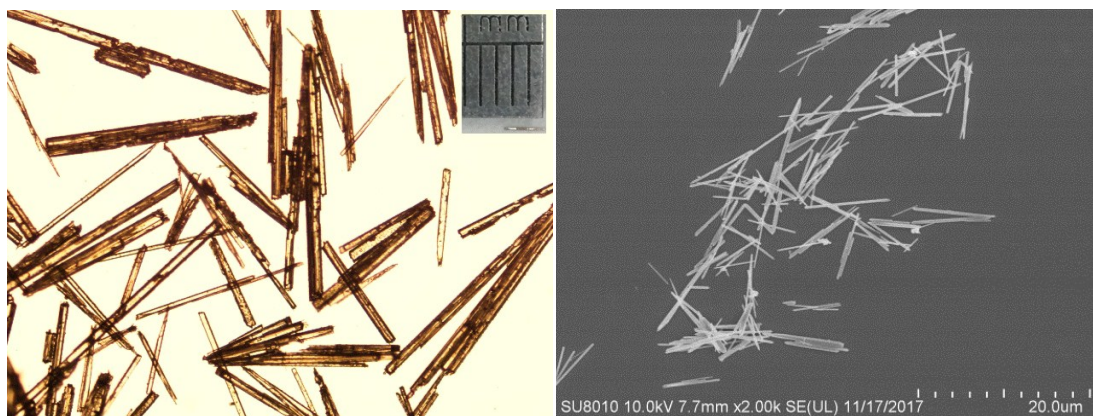

Fig. S3 (a) Optical photograph of the milli-sized rod-like crystals of **Zn(tbip)** and (b) SEM images of nano-sized **Zn(tbip)**.

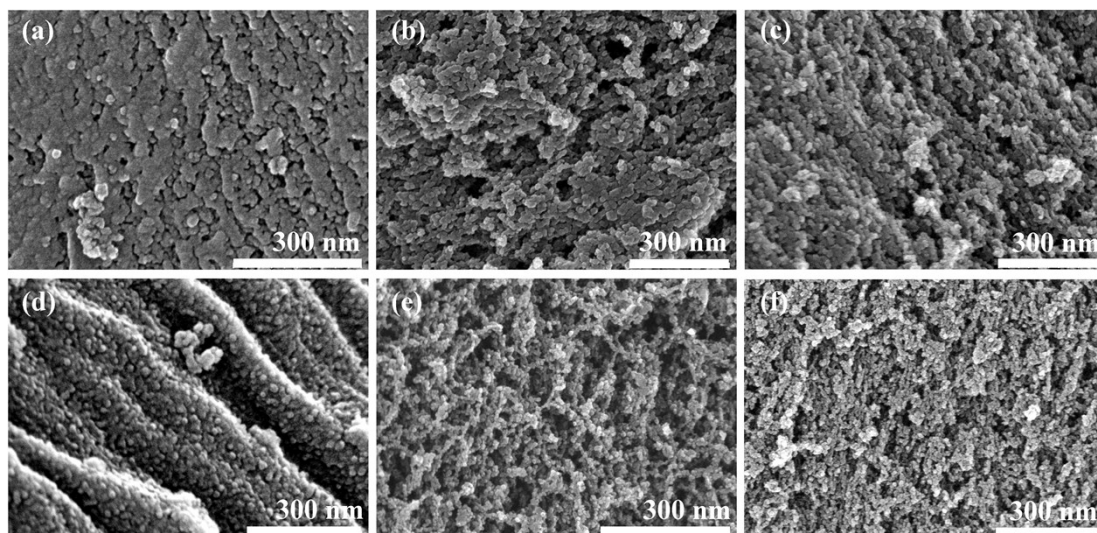

Fig. S4 SEM images of (a) **C-B-800**, (b) **C-B-900**, (c) **C-B-1000**, (d) **C-S-800**, (e) **C-S-900** and (f) **C-S-1000**.

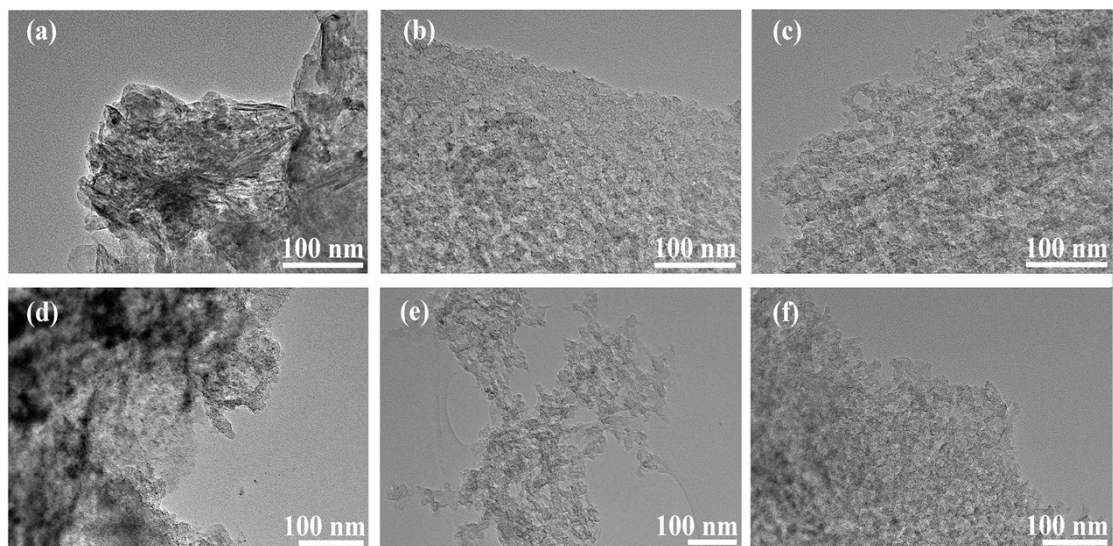

Fig. S5 TEM images of (a) **C-B-800**, (b) **C-B-900**, (c) **C-B-1000**, (d) **C-S-800**, (e) **C-S-900** and (f) **C-S-1000**.

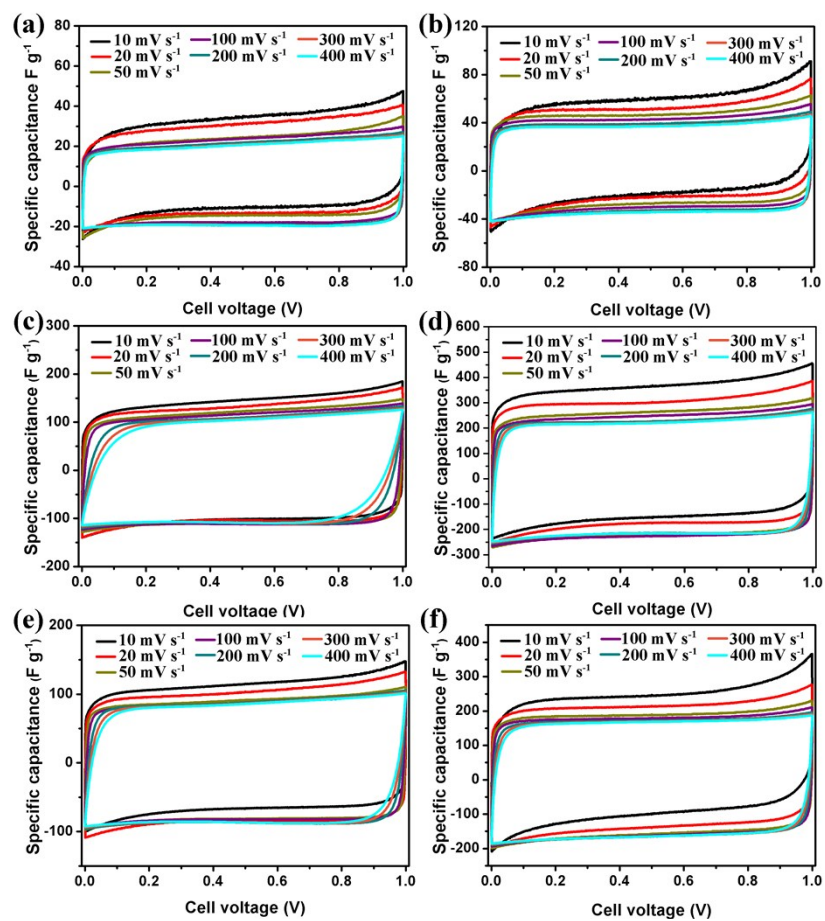

Fig. S6 Cyclic voltammeteral curves at different sweep rates (10-400  $\text{mV s}^{-1}$ ) for (a) C-B-800, (b) C-B-900, (c) C-B-1000, (d) C-S-800, (e) C-S-900 and (f) C-S-1000.

Table S1. The specific capacitance of **C-B-n** and **C-S-n** calculated by the data of CV curves in Figure S6.

| Scan rate [mV s <sup>-1</sup> ]      | 10  | 25  | 50  | 100 | 200 | 300 | 400 |
|--------------------------------------|-----|-----|-----|-----|-----|-----|-----|
| <b>C-B-800</b> [F g <sup>-1</sup> ]  | 35  | 32  | 25  | 24  | 22  | 21  | 21  |
| <b>C-S-800</b> [F g <sup>-1</sup> ]  | 61  | 51  | 47  | 43  | 40  | 39  | 38  |
| <b>C-B-900</b> [F g <sup>-1</sup> ]  | 116 | 104 | 93  | 90  | 89  | 87  | 86  |
| <b>C-S-900</b> [F g <sup>-1</sup> ]  | 369 | 305 | 268 | 254 | 231 | 229 | 226 |
| <b>C-B-1000</b> [F g <sup>-1</sup> ] | 148 | 135 | 125 | 117 | 111 | 110 | 107 |
| <b>C-S-1000</b> [F g <sup>-1</sup> ] | 248 | 218 | 194 | 183 | 176 | 172 | 170 |

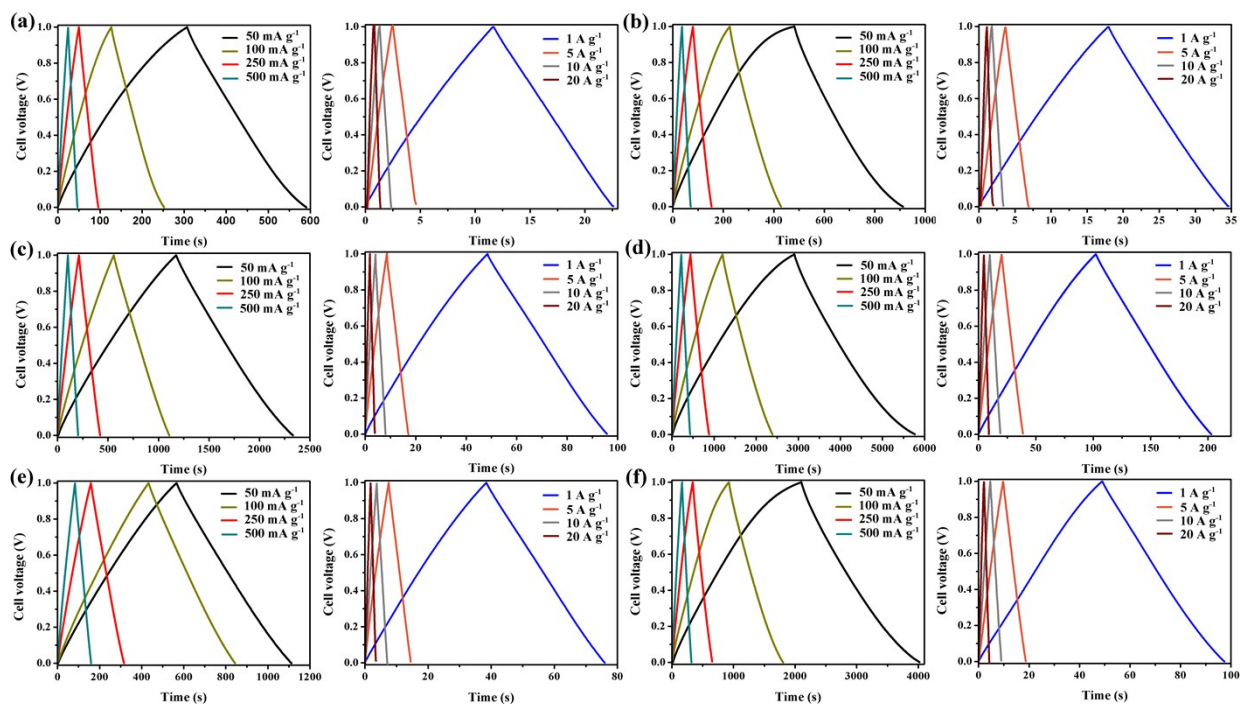

Fig. S7 Galvanostatic charge-discharge curves at different current densities for (a) **C-B-800**, (b) **C-B-900**, (c) **C-B-1000**, (d) **C-S-800**, (e) **C-S-900** and (f) **C-S-1000**.



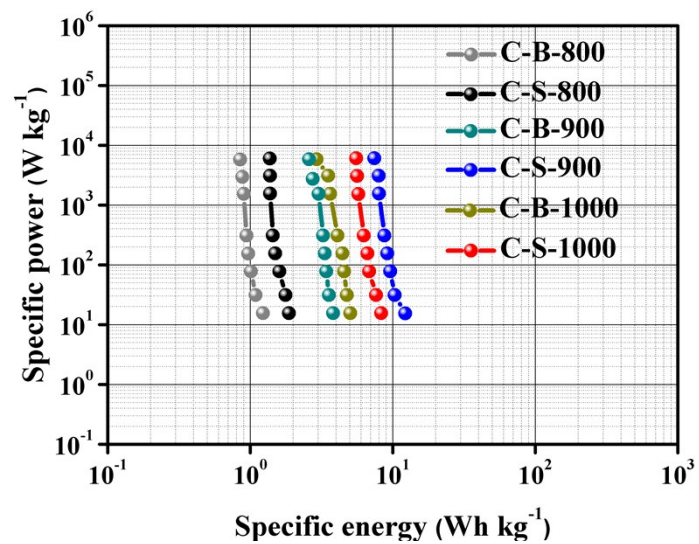

Fig. S8 Ragone plots (energy density vs power density) for C-B-n and C-S-n based symmetric supercapacitor.
